# Supplementary material
Source: MDPI journal article supplement (https://www.mdpi.com/1999-4907/14/7/1438)
Supplement: s1 [file s1]

# Supporting information:

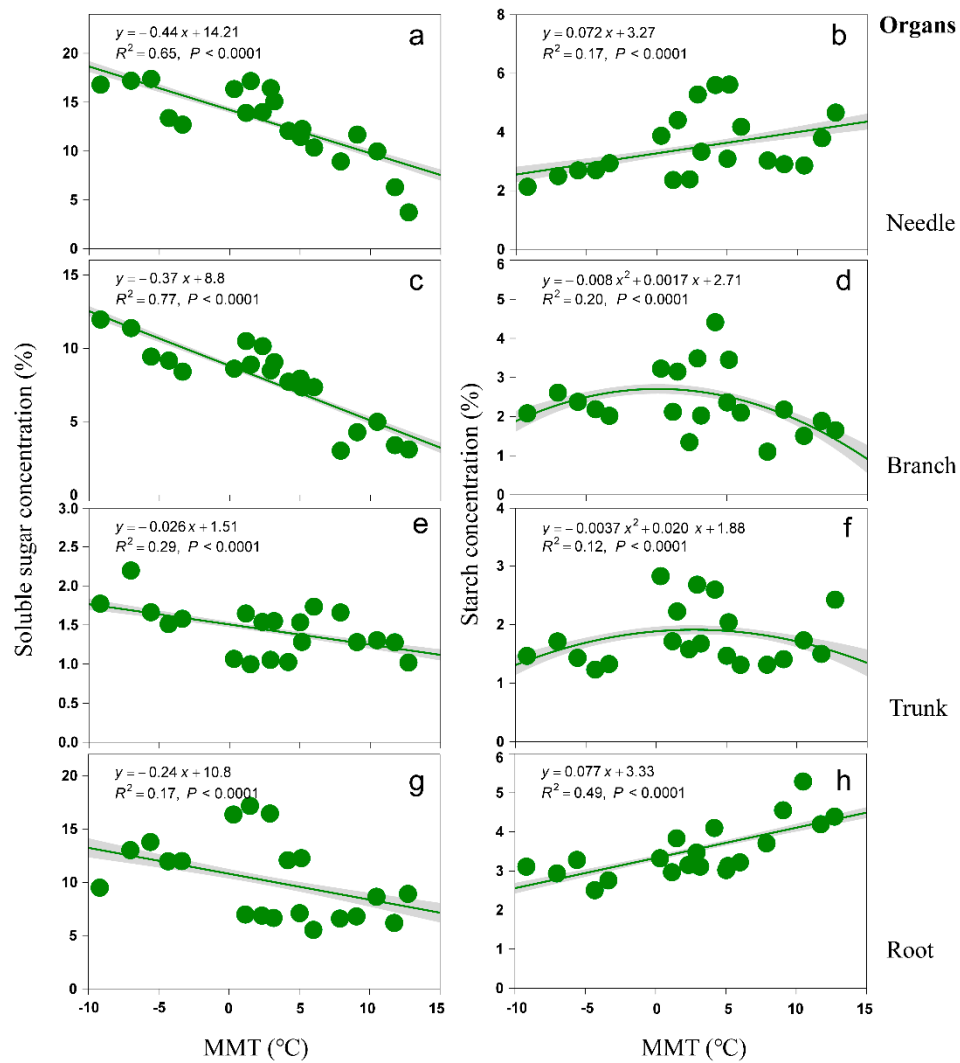

**Figure S1.** The linear relationships of soluble sugar and starch concentration of Faxon fir organs with mean monthly temperature (MMT). Solid lines indicate a significant relationship. Each point is a mean value (n=6).

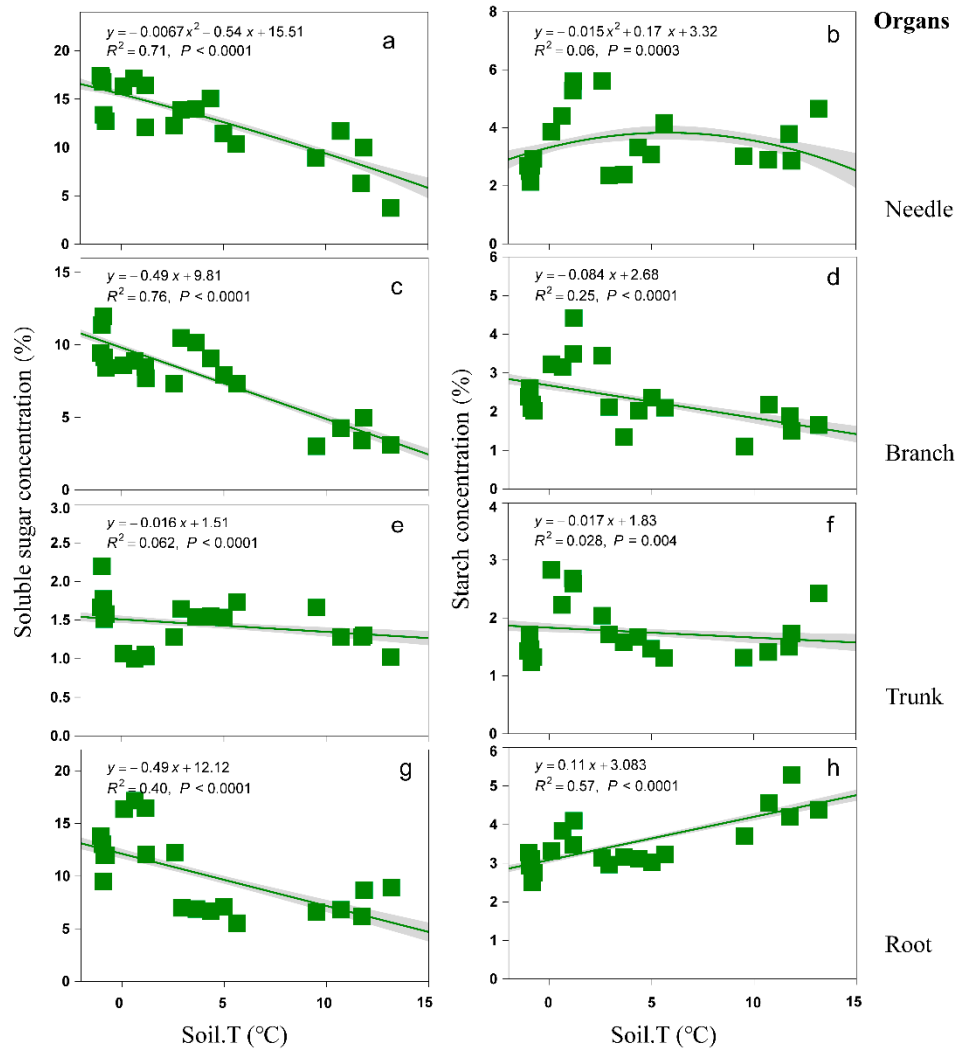

**Figure S2.** Correlations between soluble sugar and starch concentration of Faxon fir organs with Soil temperature. Each point is a mean value.

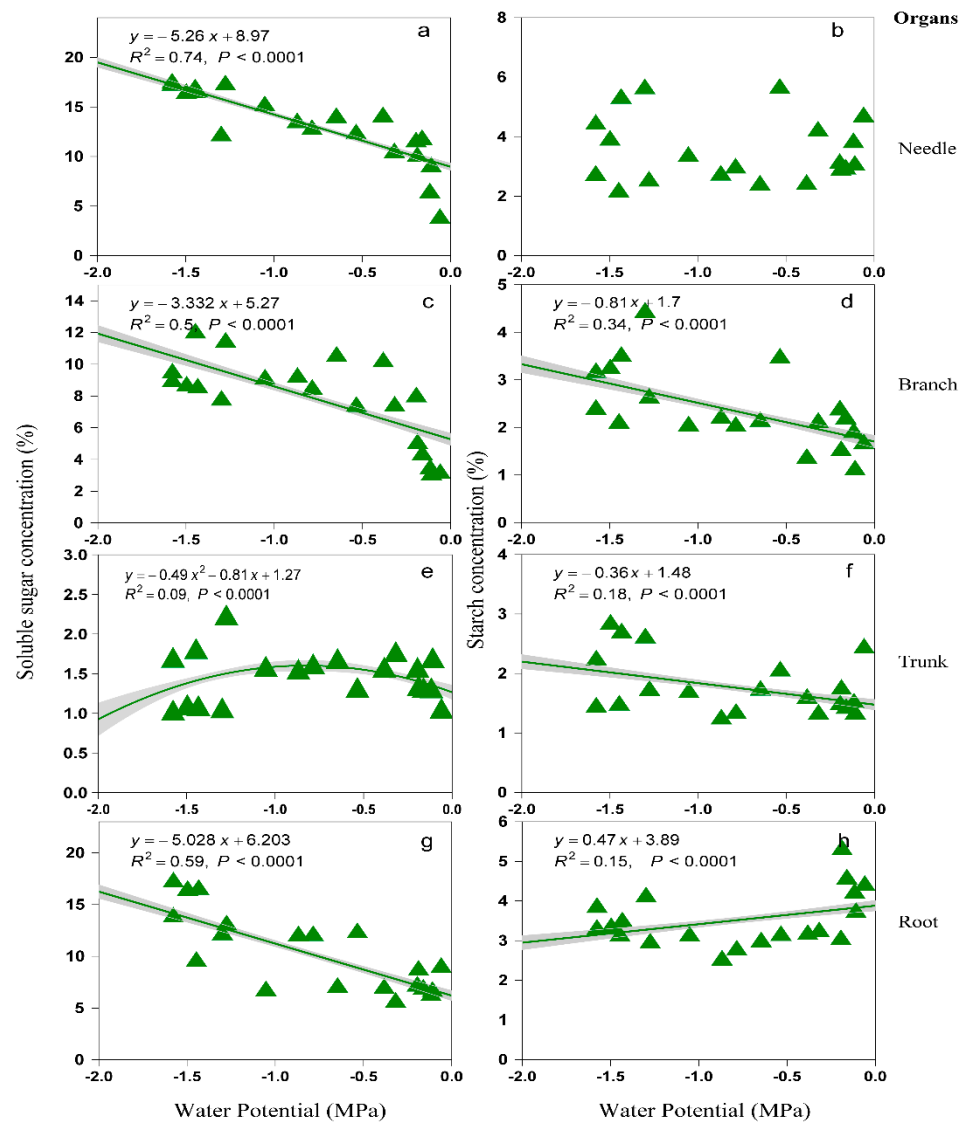

**Figure S3.** Correlations between soluble sugar and starch concentration of Faxon fir organs with Pre-dawn leaf water potential. Each point is a mean value.

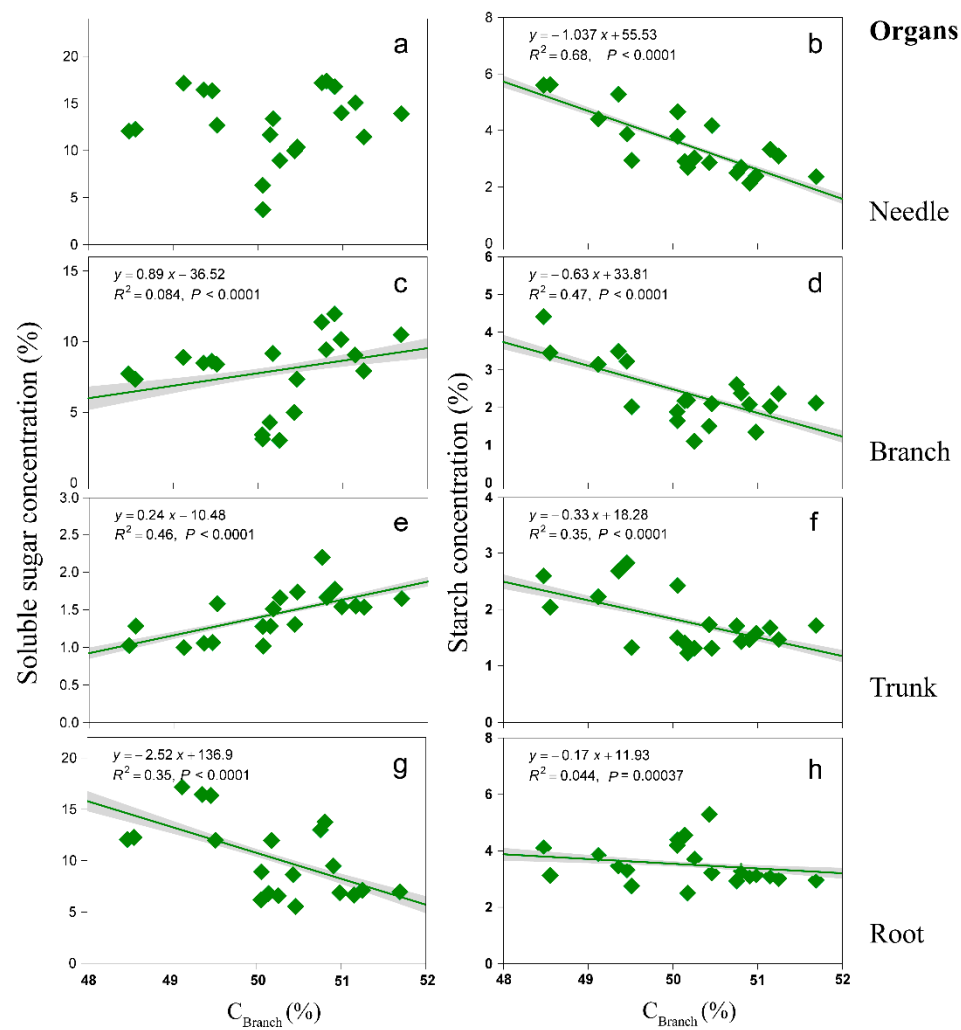

**Figure S4.** The linear relationship of soluble sugar and starch concentration of Faxon fir with needle carbon content.  $C_{Branch}$ : needle carbon content. Each point is a mean value.

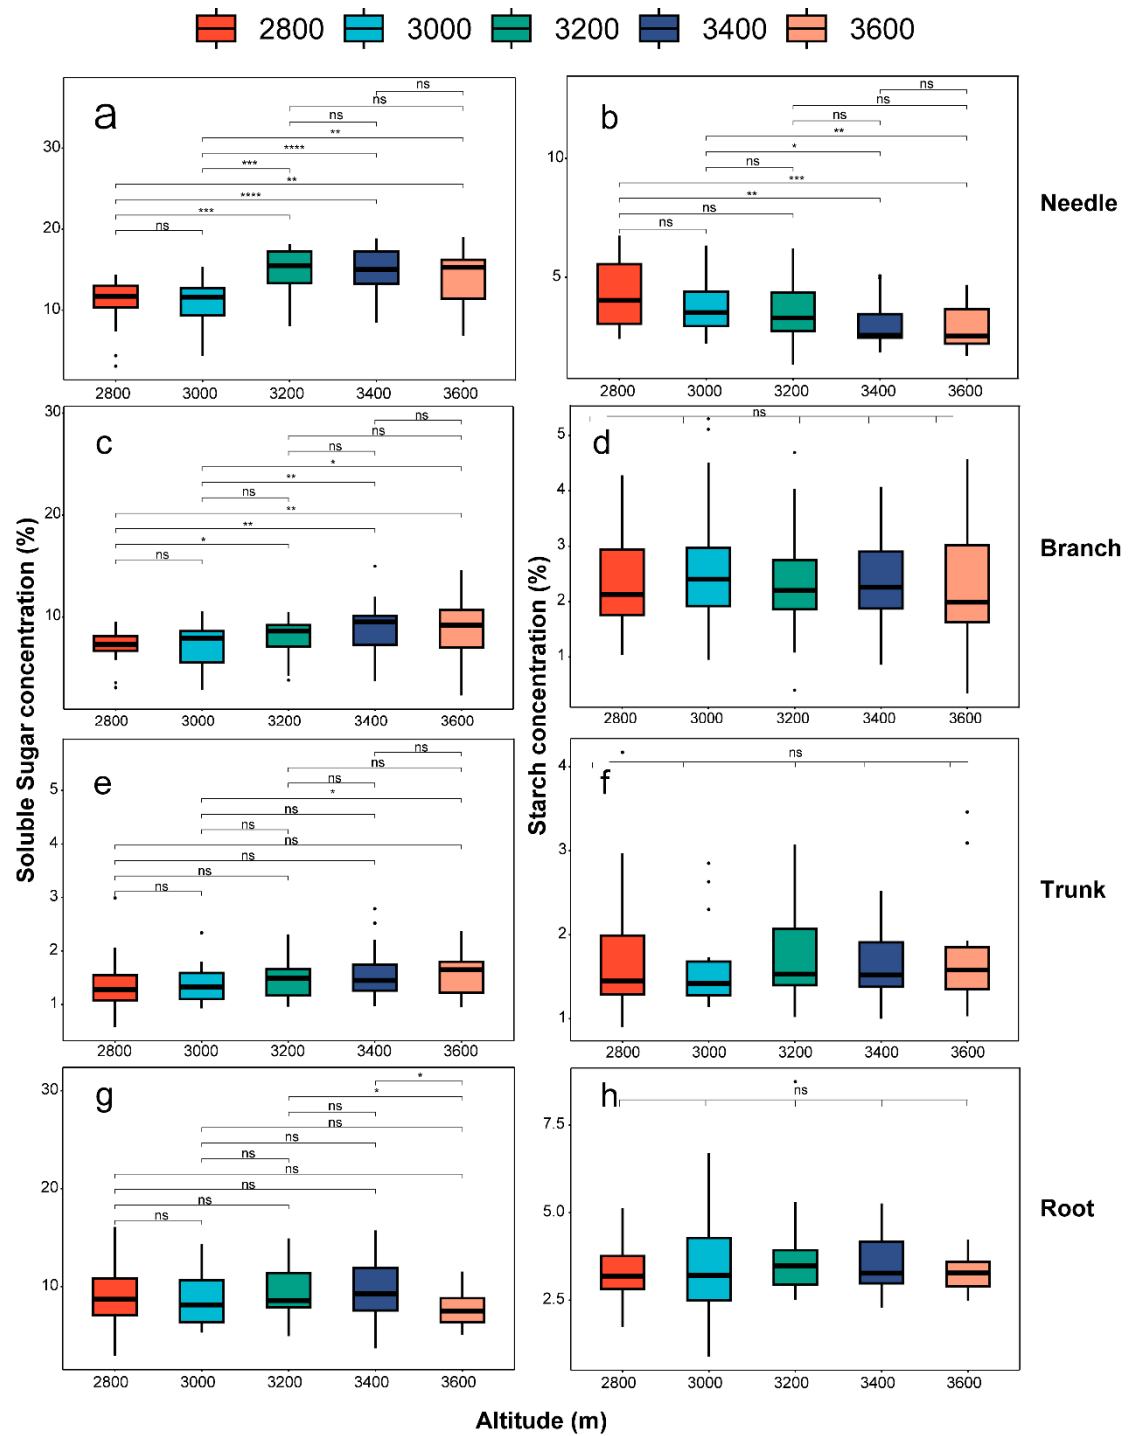

**Figure S5.** One-way analysis of variance of Faxon Fir organ's (Needle, a b; Branch, c d; Trunk, e f; Root, g h) soluble sugar and starch concentration among five study sites. “\*” means significant difference; “ns” means no difference.
